# Supplementary material
Source: publisher figshare collection journal article supplement (https://gsajournals.figshare.com/ndownloader/files/23992562)
Supplement: Supplementary file 1 [file 23992562]

## Sheet: Sheet1
Table S1. Summary of Collaborative Cross (CC) strains used to generate the CC-RIX mice that were tested in this study
CC strain name	Alias	% hetero-zygosity	WGS available?	Currently available from UNC_SGCF	A/J	C57BL/6J	129S1/SvImJ	NOD/ShiLtJ	NZO/HlLtJ	CAST/EiJ	PWK/PhJ	WSB/EiJ	# of founders	Extreme Distance	Extreme Vertical	Extreme Centroid	Extreme VCM	Extreme EPS	Multiple Extreme
CC001/Unc	3140	4.6	yes	yes	0.1932	0.2175	0.1217	0.0379	0.1836	0.0687	0.0991	0.0784	8	0	0	0	1	0	0
CC002/Unc	5156	10.2	yes	yes	0.196	0.1141	0.2256	0.0597	0.1774	0.1135	0.0569	0.0568	8	0	0	0	0	1	0
CC003/Unc	3067	8.9	yes	yes	0.0665	0.2816	0.1183	0.0894	0.0704	0.0808	0.1198	0.1732	8	0	0	0	0	0	0
CC004/TauUnc	6188	5.2	yes	yes	0.0895	0.1294	0.2431	0.0753	0.1258	0.0603	0.0552	0.2214	8	0	0	0	1	0	0
CC005/TauUnc	6211	1.1	yes	yes	0.1679	0.122	0.1823	0.2563	0.1136	0.0581	0.0421	0.0577	8	0	0	0	0	0	0
CC006/TauUnc	6750	8.3	yes	yes	0.1147	0.1445	0.2506	0.1768	0.1477	0.0645	0.0653	0.036	8	0	0	0	0	0	0
CC007/Unc	3421	9.8	yes	yes	0.1282	0.1262	0.1769	0.1461	0.1667	0.0182	0.0813	0.1563	8	1	1	0	0	0	1
CC008/GeniUnc	8036	5.3	yes	yes	0.0722	0.1793	0.0481	0.1173	0.2544	0.0304	0.1522	0.1462	8	0	0	0	0	0	0
CC009/Unc	5489	8.4	yes	yes	0.1268	0.0925	0.1491	0.1426	0.2003	0.0343	0.142	0.1124	8	0	0	0	0	0	0
CC010/GeniUnc	8018	3.4	yes	yes	0.18	0.078	0.157	0.1535	0.2227	0.0775	0.0266	0.1048	8	0	0	0	0	0	0
CC011/Unc	3252	5.9	yes	yes	0.1591	0.1649	0.1932	0.1145	0.1152	0.0318	0.085	0.1364	8	0	0	0	1	0	0
CC012/GeniUnc	8005	9.3	yes	yes	0.1239	0.1195	0.1548	0.1989	0.1444	0.066	0.0815	0.1109	8	0	0	0	0	0	0
CC013/GeniUnc	8010	0.5	yes	yes	0.0903	0.1284	0.1057	0.102	0.3769	0	0.0383	0.1584	7	0	0	0	0	0	0
CC014/Unc	3415	>10	no	no	0.108	0.086	0.18	0.216	0.135	0.036	0.116	0.123	8	0	0	0	0	0	0
CC015/Unc	3154	8.6	yes	yes	0.1339	0.1233	0.0743	0.2395	0.162	0.1171	0.0624	0.0874	8	0	0	0	0	0	0
CC016/GeniUnc	8024	3.7	yes	yes	0.1378	0.221	0.0943	0.1009	0.1263	0.0437	0	0.2759	7	0	0	0	0	0	0
CC017/Unc	3032	7.4	yes	yes	0.1712	0.093	0.1436	0.0662	0.1294	0.1537	0.0627	0.1802	8	0	0	0	0	0	0
CC018/Unc	3609	9.6	yes	no	0.083	0.1878	0.194	0.1834	0.0655	0.0573	0.0842	0.1449	8	0	0	0	0	0	0
CC019/TauUnc	6513	9	yes	yes	0.152	0.1221	0.2511	0.0004	0.0554	0.0359	0	0.3831	6	0	0	0	0	0	0
CC020/GeniUnc	8054	4.5	yes	no	0.1993	0.1682	0.105	0.1864	0.1529	0.043	0.0838	0.0614	8	1	0	0	0	0	0
CC021/Unc	1566	6.3	yes	yes	0.0791	0.2001	0.1013	0.0716	0.1315	0.1685	0.1065	0.1414	8	0	0	1	0	1	1
CC022/GeniUnc	8046	7.4	yes	no	0.1195	0.0945	0.0373	0.1228	0.2216	0.1653	0.0738	0.1652	8	1	1	0	0	0	1
CC023/GeniUnc	8043	8.6	yes	yes	0.117	0.1798	0.1328	0.1466	0.0992	0.0852	0.0932	0.1463	8	0	1	0	0	0	0
CC024/GeniUnc	8004	3.6	yes	yes	0.1556	0.1192	0.0923	0.1311	0.1947	0.134	0.0705	0.1026	8	0	0	1	0	0	0
CC025/GeniUnc	8008	5.3	yes	yes	0.0826	0.0843	0.1417	0.1908	0.125	0.1079	0.1071	0.1606	8	1	0	0	0	0	0
CC026/GeniUnc	8026	4.6	yes	yes	0.0966	0.1184	0.112	0.0349	0.1663	0.0987	0	0.3731	7	0	0	0	1	0	0
CC027/GeniUnc	8027	8.2	yes	yes	0.0442	0.1885	0.1676	0.1832	0.0936	0.0807	0.0488	0.1933	8	0	0	0	0	0	0
CC028/GeniUnc	8016	2.1	yes	no	0.0681	0.1049	0.1166	0.1361	0.2055	0.1084	0.0663	0.1941	8	1	0	0	1	0	1
CC030/GeniUnc	8034	8.4	yes	yes	0.1824	0.1604	0.1056	0.0765	0.1446	0.1864	0.057	0.0871	8	0	0	0	0	0	0
CC031/GeniUnc	8031	8.3	yes	yes	0	0.3233	0.1585	0.27	0.1099	0.0625	0.0757	0	6	0	0	0	1	0	0
CC032/GeniUnc	8002	8.6	yes	yes	0.1451	0.1854	0.1349	0	0.217	0.1221	0.0464	0.1491	7	0	0	1	0	0	0
CC033/GeniUnc	8033	9.3	yes	yes	0.2006	0.1469	0.0848	0.142	0.1121	0.0419	0.1075	0.1642	8	0	1	0	0	0	0
CC034/Unc	5080	9.3	yes	no	0.1943	0.1521	0.1683	0.0952	0.1162	0.0513	0.0799	0.1429	8	0	0	0	0	0	0
CC035/Unc	5035	11.2	yes	yes	0.1458	0.1188	0.0846	0.1449	0.1487	0.1067	0.0864	0.1642	8	0	0	1	0	0	0
CC036/Unc	477	9	yes	yes	0.1292	0.181	0.1305	0.1194	0.1482	0.0765	0.0561	0.1591	8	0	0	0	0	0	0
CC037/TauUnc	6072	1.1	yes	yes	0.1855	0.2618	0.0993	0.2735	0.0007	0.0499	0	0.1293	6	0	0	0	0	0	0
CC038/GeniUnc	8049	4.3	yes	yes	0.113	0.1384	0.1737	0.1388	0.1183	0.1225	0.1044	0.0909	8	0	0	0	1	1	1
CC039/Unc	5155	10.3	yes	yes	0.1488	0.0508	0.1162	0.1483	0.1079	0.1392	0.0697	0.219	8	0	0	0	0	0	0
CC040/TauUnc	6557	11.4	yes	yes	0.1043	0.0902	0.1794	0.1204	0.1923	0.1092	0.0675	0.1368	8	0	1	0	0	0	0
CC041/TauUnc	6441	9.5	yes	yes	0.0216	0.0005	0.3039	0.3077	0.1891	0.0613	0	0.1159	6	0	0	0	0	1	0
CC042/GeniUnc	8042	6.3	yes	yes	0.0359	0.181	0.1706	0	0.3026	0.0671	0.0711	0.1716	7	0	1	0	0	1	1
CC043/GeniUnc	8021	4.7	yes	yes	0.0748	0.0606	0.201	0.2028	0.1506	0.0832	0.0647	0.1622	8	0	0	0	0	0	0
CC044/Unc	4410	10.2	yes	yes	0.1294	0.1388	0.1884	0.0975	0.1035	0.1037	0.1584	0.0802	8	0	0	0	0	0	0
CC046/Unc	5346	10.3	yes	yes	0.1031	0.1476	0.1471	0.1619	0.1173	0.0972	0.0919	0.134	8	1	1	0	0	0	1
CC047/Unc	5612	6.1	yes	no	0.0924	0.2265	0.109	0.143	0.0914	0.1285	0.0759	0.1333	8	0	0	1	0	1	1
CC048/Unc	5248	>8.0	no	no	0.076	0.0635	0.1529	0.1455	0.2032	0.1531	0.104	0.1019	8	0	0	0	0	0	0
CC049/TauUnc	6296	13.1	yes	yes	0.048	0.1517	0.1456	0.1652	0.1396	0.0762	0.065	0.2087	8	0	0	0	0	0	0
CC050/Unc	867	4.6	yes	no	0.1641	0.0606	0.0864	0.1727	0.1809	0.0478	0.1809	0.1066	8	0	0	1	0	0	0
CC051/TauUnc	6912	6.9	yes	yes	0.2972	0.2429	0.1155	0.0785	0.1396	0	0	0.1264	6	0	0	0	0	0	0
CC052/GeniUnc	8052	10.4	yes	no	0.1248	0.0888	0.1138	0.1448	0.1337	0.0497	0.1767	0.1678	8	0	0	0	0	0	0
CC053/Unc	773	11.4	yes	yes	0.1292	0.1481	0.0982	0.1364	0.0603	0.1225	0.1026	0.2027	8	0	0	0	0	0	0
CC055/TauUnc	6680	10.6	yes	yes	0.06	0.03	0.2258	0.1987	0.1297	0.0949	0.084	0.1769	8	0	0	0	0	0	0
CC056/GeniUnc	8056	4.3	yes	no	0.1557	0.1558	0.255	0	0.2693	0	0.0567	0.1075	6	0	0	0	0	0	0
CC057/Unc	3393	10.7	yes	yes	0.1182	0.1393	0.1461	0.091	0.2194	0.1003	0.0215	0.1641	8	0	0	0	0	0	0
CC059/TauUnc	6012	10.3	yes	yes	0.3163	0.2741	0.0896	0.1084	0.1336	0.0001	0	0.078	6	0	0	0	0	0	0
CC061/GeniUnc	8048	5.1	yes	yes	0.1775	0.2719	0.1284	0.0916	0.074	0.0902	0.0933	0.073	8	0	0	0	0	1	0
CC062/Unc	5306	11.8	yes	yes	0.0241	0.0652	0.1689	0.2435	0.2279	0.072	0.0792	0.1191	8	0	0	0	0	0	0
CC063/Unc	5391	7.2	yes	no	0.1148	0.1457	0.0916	0.244	0.1266	0.0554	0.1893	0.0325	8	1	0	0	0	0	0
CC065/Unc	5119	8.1	yes	yes	0.0968	0.1822	0.124	0.0748	0.217	0.1075	0.0788	0.1189	8	0	0	0	0	0	0
CC073/Unc	1515	6.6	yes	no	0.0521	0.1356	0.2427	0.0882	0.1026	0.131	0.0965	0.1513	8	0	0	0	0	0	0
CC074/Unc	3015	10.3	yes	yes	0.1189	0.2028	0.0872	0.1622	0.116	0.1136	0.0829	0.1165	8	0	0	0	0	0	0
OR559	559	<4.00	no	no	0.2119	0.0386	0.2291	0.0644	0.109	0.1952	0.0345	0.1172	8	0	0	1	0	0	0
The 73 RIX lines used in our study were derived from the 62 CC lines summarized above. Here, we include information on CC strain name (column 1), alias (column 2), percentage of heterozygosity (column 3), if they have been whole genome sequenced (WGS; column 4), availability of WGS data (column 5), if strain is available at the UNC Systems Genetics Core Facility (column 6), percentage of founder …
